# Supplementary material
Source: publisher site journal article supplement (https://www.dovepress.com/article/294129)

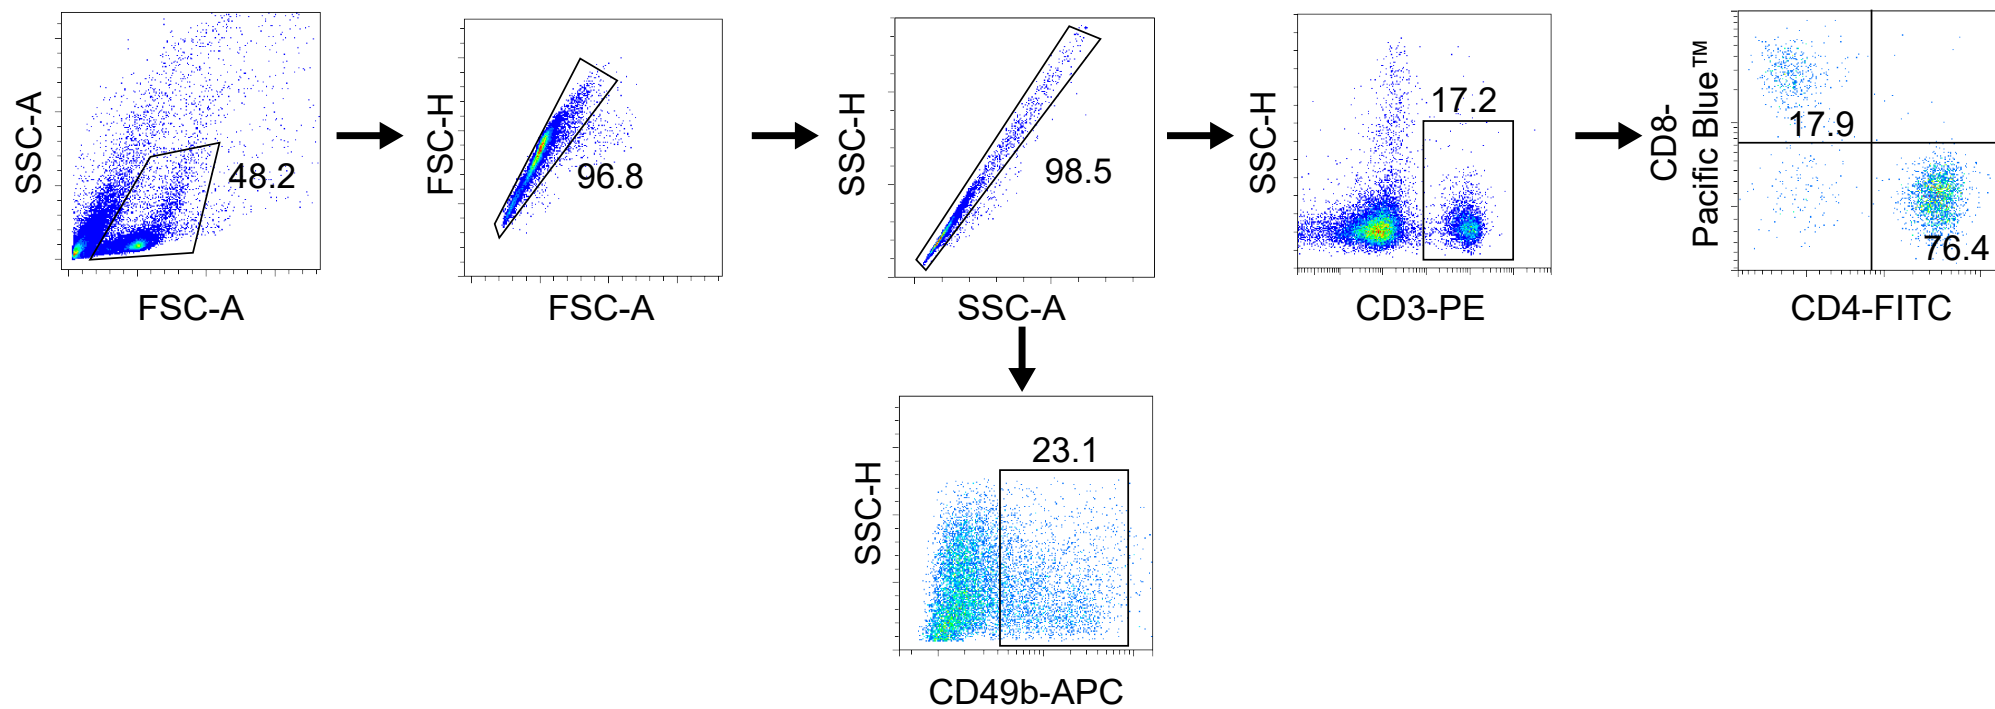

Supplementary material Figure 1 Gating strategy for 4T1-luc tumor infiltrating cells analysis.

Supplement: Supplementary file 1 [file get_supplementary_file.php]
